# Supplementary material for: Identification of Inhibitors to Trypanosoma cruzi Sirtuins Based on Compounds Developed to Human Enzymes
Source: PubMed Central journal article supplement (PMC7279216; doi:10.3390/ijms21103659), 2020-05-22

## Supplementary Tables

Table S1. Comparative analysis of amino acid sequence of *T. cruzi* vs human sirtuins (% identity).

|           | SIRT1 | SIRT2 | SIRT3 | SIRT4 | SIRT5 | SIRT6 | SIRT7 |
|-----------|-------|-------|-------|-------|-------|-------|-------|
| TcSir2rp1 | 14    | 29    | 24    | 18    | 20    | 19    | 17    |
| TcSir2rp3 | 7     | 14    | 17    | 23    | 28    | 16    | 13    |

Table S2. Comparison of Smina and Plants docking software

| Docking Program | Scoring Function | DA%  |      |
|-----------------|------------------|------|------|
|                 |                  | ECDR | RCDR |
| Smina           | AD4_SCORING      | 41.3 | 45.7 |
|                 | AD4_SCORING*     | 50.0 | 50.0 |
|                 | VINARDO          | 69.6 | 56.5 |
|                 | VINARDO*         | 69.6 | 52.2 |
|                 | VINA             | 73.9 | 56.5 |
|                 | VINA*            | 73.9 | 67.4 |
| Plants          | CHEMPLP          | 47.8 | 58.7 |
|                 | PLP95            | 34.8 | 43.5 |
|                 | PLP              | 54.3 | 56.5 |

\* after using the minimization feature

Table S3. Molecular docking numerical results for the active MC inhibitors.

| Inhibitor   | Protein   | Cofactor   | Predicted Affinity<br>(kcal/mol) |
|-------------|-----------|------------|----------------------------------|
| <b>15</b>   | TcSir2RP1 | NAD        | <b>-8.9</b>                      |
|             |           | ADP-ribose | -8.0                             |
|             |           | Apoprotein | -7.7                             |
| <b>Z-17</b> | TcSir2RP1 | NAD        | <b>-11.6</b>                     |
|             |           | ADP-ribose | -10.2                            |
|             |           | Apoprotein | -10.3                            |
| <b>E-17</b> | TcSir2RP1 | NAD        | <b>-11.5</b>                     |

|              |           |            |              |
|--------------|-----------|------------|--------------|
|              |           | ADP-ribose | -11.0        |
|              |           | Apoprotein | -10.9        |
|              |           | NAD        | -10.2        |
| <b>Z-R-8</b> | TcSir2RP3 | ADP-ribose | -8.1         |
|              |           | Apoprotein | <b>-11.0</b> |
|              |           | NAD        | -10.3        |
| <b>Z-S-8</b> | TcSir2RP3 | ADP-ribose | -7.7         |
|              |           | Apoprotein | <b>-12.2</b> |
|              |           | NAD        | -10.1        |
| <b>E-R-8</b> | TcSir2RP3 | ADP-ribose | -9.4         |
|              |           | Apoprotein | <b>-11.3</b> |
|              |           | NAD        | -10.1        |
| <b>E-S-8</b> | TcSir2RP3 | ADP-ribose | -9.1         |
|              |           | apoprotein | <b>-11.1</b> |
|              |           | NAD        | -10.5        |
| <b>13</b>    | TcSir2RP3 | ADP-ribose | -8.3         |
|              |           | Apoprotein | <b>-12.2</b> |
|              |           | NAD        | -12.4        |
| <b>12</b>    | TcSir2RP3 | ADP-ribose | -9.1         |
|              |           | Apoprotein | -13.0        |
|              |           | NAD        | -8.3         |
| <b>Z-30</b>  | TcSir2RP3 | ADP-ribose | -6.8         |
|              |           | Apoprotein | <b>-9.4</b>  |
|              |           | NAD        | -8.1         |
| <b>E-30</b>  | TcSir2RP3 | ADP-ribose | -6.8         |
|              |           | Apoprotein | <b>-9.5</b>  |
|              |           | NAD        | -8.5         |
| <b>Z-31</b>  | TcSir2RP3 | ADP-ribose | -6.8         |
|              |           | Apoprotein | <b>-9.2</b>  |
|              |           | NAD        | -8.7         |
| <b>E-31</b>  | TcSir2RP3 | ADP-ribose | -6.9         |
|              |           | Apoprotein | <b>-9.5</b>  |
| <b>Z-32</b>  | TcSir2RP3 | NAD        | -8.2         |

|             |           |            |      |
|-------------|-----------|------------|------|
|             |           | ADP-ribose | -6.9 |
|             |           | apoprotein | -9.4 |
|             |           | NAD        | -8.3 |
| <b>E-32</b> | TcSir2RP3 | ADP-ribose | -7.0 |
|             |           | apoprotein | -9.5 |

Table S4. Combinatory index (CI) of 12 and BZN

|         | EC <sub>50</sub> ratio |           | Concentration (μM) |           | CI*  |
|---------|------------------------|-----------|--------------------|-----------|------|
|         | BZN                    | <b>12</b> | BZN                | <b>12</b> |      |
| Ratio 1 | 1/32                   | 1/32      | 0.8                | 1.6       | 6.6  |
| Ratio 2 | 1/16                   | 1/16      | 1.5                | 3.3       | 13.2 |
| Ratio 3 | 1/8                    | 1/8       | 3                  | 6.5       | 1.02 |
| Ratio 4 | 1/4                    | 1/4       | 6                  | 12.5      | 0.82 |
| Ratio 5 | 1/2                    | 1/2       | 12                 | 25        | 1.14 |
| Ratio 6 | 1                      | 1         | 24                 | 50        | 1.48 |
| Ratio 7 | 2                      | 2         | 48                 | 100       | 2.29 |

\*CI=combinatory index. CI<1 synergism; CI=1 addition/no difference; CI>1 antagonistic

Table S5. Trypanocidal effect of drug combination 17 and BZN

|         | EC <sub>50</sub> ratio |           | Concentration (μM) |           | CI*  |
|---------|------------------------|-----------|--------------------|-----------|------|
|         | BZN                    | <b>17</b> | BZN                | <b>17</b> |      |
| Ratio 1 | 1/32                   | 1/32      | 0.8                | 1.06      | 0.38 |
| Ratio 2 | 1/16                   | 1/16      | 1.5                | 2.13      | 0.69 |
| Ratio 3 | 1/8                    | 1/8       | 3                  | 4.25      | 0.73 |
| Ratio 4 | 1/4                    | 1/4       | 6                  | 8.5       | 0.74 |
| Ratio 5 | 1/2                    | 1/2       | 12                 | 17        | 1.25 |
| Ratio 6 | 1                      | 1         | 24                 | 34        | 2.45 |
| Ratio 7 | 2                      | 2         | 48                 | 68        | 3.52 |

Table S6. Trypanocidal effect of drug combination 32 and BZN

|         | EC <sub>50</sub> ratio |           | Concentration (μM) |           | CI*  |
|---------|------------------------|-----------|--------------------|-----------|------|
|         | BZN                    | <b>32</b> | BZN                | <b>32</b> |      |
| Ratio 1 | 1/32                   | 1/32      | 0.8                | 0.9       | 0.19 |

|         |      |      |     |     |      |
|---------|------|------|-----|-----|------|
| Ratio 2 | 1/16 | 1/16 | 1.5 | 1.8 | 0.30 |
| Ratio 3 | 1/8  | 1/8  | 3   | 3.5 | 0.82 |
| Ratio 4 | 1/4  | 1/4  | 6   | 7   | 0.84 |
| Ratio 5 | 1/2  | 1/2  | 12  | 14  | 1.56 |
| Ratio 6 | 1    | 1    | 24  | 28  | 1.66 |
| Ratio 7 | 2    | 2    | 48  | 56  | 1.82 |

Table S7. List of complexes used for the docking assessment

| <b>PDB ID</b> | <b>Ligand Name</b> | <b>Cofactor Name</b> | <b>Sirtuin</b> |
|---------------|--------------------|----------------------|----------------|
| 4I5I          | 4I5                | AR6                  | hSIRT1         |
| 5MAT          | 7KJ                | AR6                  | hSIRT2         |
| 5Y0Z          | OK9                | CNA                  | hSIRT2         |
| 4RMI          | 3TK                | NAD <sup>+</sup>     | hSIRT2         |
| 5D7Q          | 4I5                | NAD <sup>+</sup>     | hSIRT2         |
| 5DY5          | 5GR                | NAD <sup>+</sup>     | hSIRT2         |
| 4JT9          | 1NS                | NAD <sup>+</sup>     | hSIRT3         |
| 4O8Z          | BBI                | NAD <sup>+</sup>     | hSIRT3         |
| 4RMG          | 3TE                | 0.0                  | hSIRT2         |
| 4RMH          | 3TE                | 0.0                  | hSIRT2         |
| 5DY4          | 5GN                | 0.0                  | hSIRT2         |
| 5MAR          | 7KE                | 0.0                  | hSIRT2         |
| 5Y5N          | 8NO                | 0.0                  | hSIRT2         |
| 5YQL          | A2I                | 0.0                  | hSIRT2         |
| 5YQM          | A2X                | 0.0                  | hSIRT2         |
| 5YQN          | L55                | 0.0                  | hSIRT2         |
| 5YQO          | L5C                | 0.0                  | hSIRT2         |
| 4BN5          | SR7                | 0.0                  | hSIRT3         |
| 4C7B          | BVB                | 0.0                  | hSIRT3         |
| 4JSR          | 1NQ                | 0.0                  | hSIRT3         |
| 4JT8          | 1NR                | 0.0                  | hSIRT3         |
| 5H4D          | BBI                | 0.0                  | hSIRT3         |
| 6HOY          | TSN                | 0.0                  | hSIRT6         |

## Supplementary Figure

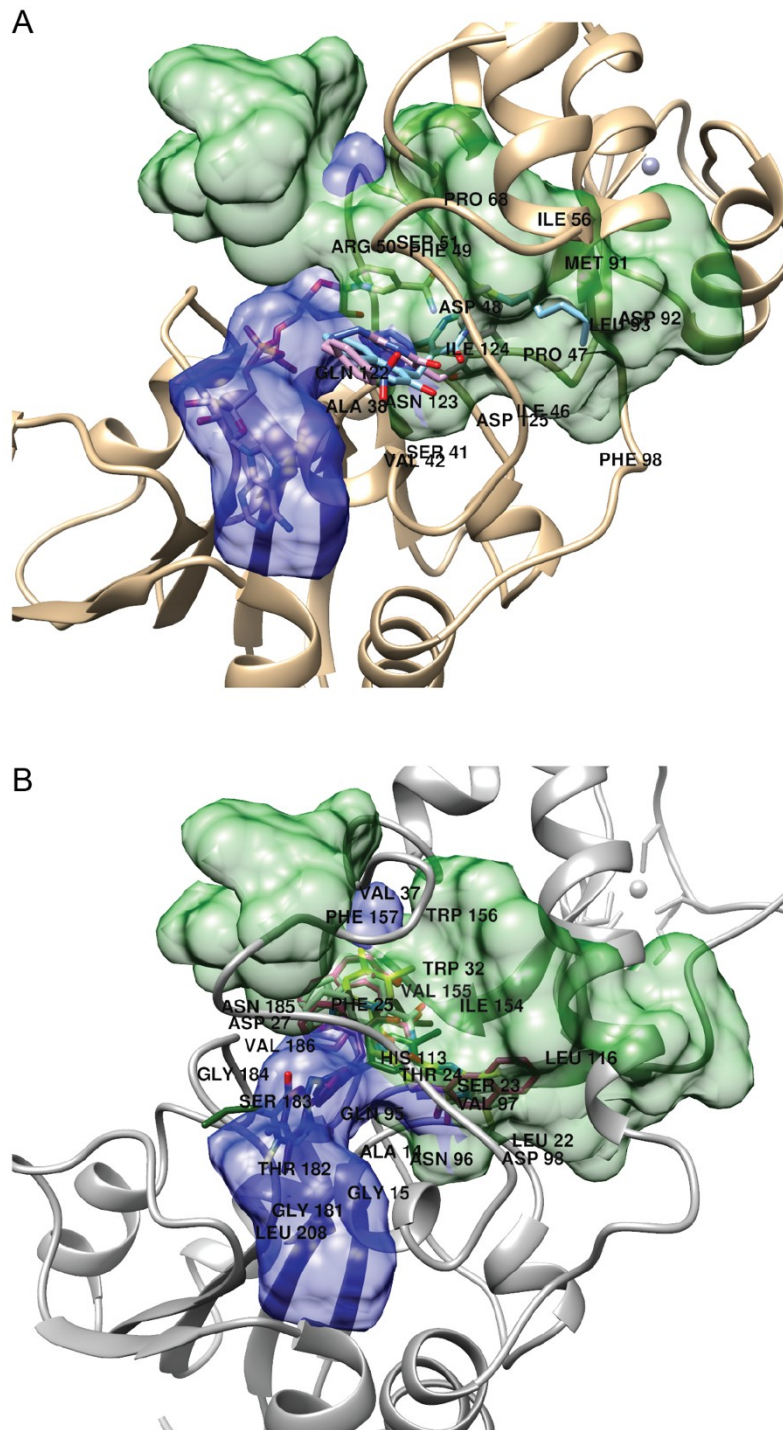

Supplement: ijms-21-03659-s001.pdf [file ijms-21-03659-s001.pdf]
